# Supplementary material for: Effects of thermal processing on the allergenicity, structure, and critical epitope amino acids of crab tropomyosin
Source: Royal Society of Chemistry journal article supplement (doi:10.1039/d0fo02869j), 2021-01-01
Supplement: d0fo02869j1.pdf [file d0fo02869j1.pdf]

**1 Supporting information**

**2 Figure S1. The frequency occurrence of amino acids in TM and seven stable epitope sequences**

3 Sequence of TM was from Genebank (QHW05413.1). The epitopes were located in 19-29, 39-48,

4 99-109, 110-123, 153-162, 170-188 and 211-221 of TM.

**5 Figure S2. Conservation of TM sequences across different species**

6 A. Conservation of non-allergenic TM sequences.

7 B. Conservation of allergenic TM sequences.

8 The red lines represent the location of TM stable epitopes.

9

10 **Figure S1**

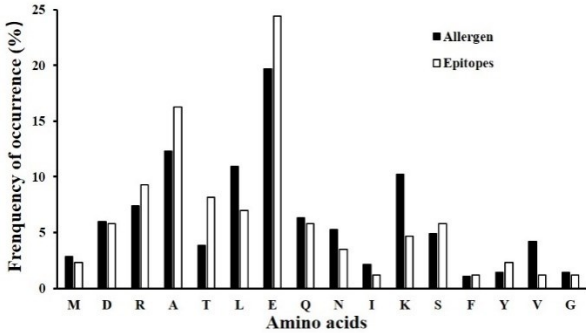

11

12

13 Figure S2

A

|                       |                                                                                                         |     |
|-----------------------|---------------------------------------------------------------------------------------------------------|-----|
| Bos_taurus            | MDAIRKRMHRIHFNNAERECFADKFAHHSFQIEELVSLQKIKATDQIRYSGDHAQCEFLAEKKAIAEAVALNRRICQEBBIRACERITAIQRIQDEEFAA    | 120 |
| Gallus_gallus         | MDAIRKRMHRIHFNNAERECFADKFAHHSFQIEELVSLQKIKATDQIRYSGDHAQCEFLAEKKAIAEAVALNRRICQEBBIRACERITAIQRIQDEEFAA    | 120 |
| Homo_sapiens_2        | MDAIRKRMHRIHFNNAERECFADKFAHHSFQIEELVSLQKIKATDQIRYSGDHAQCEFLAEKKAIAEAVALNRRICQEBBIRACERITAIQRIQDEEFAA    | 120 |
| Homo_sapiens_4        | MDAIRKRMHRIHFNNAERECFADKFAHHSFQIEELVSLQKIKATDQIRYSGDHAQCEFLAEKKAIAEAVALNRRICQEBBIRACERITAIQRIQDEEFAA    | 120 |
| Oryctolagus_cuniculus | MDAIRKRMHRIHFNNAERECFADKFAHHSFQIEELVSLQKIKATDQIRYSGDHAQCEFLAEKKAIAEAVALNRRICQEBBIRACERITAIQRIQDEEFAA    | 120 |
| Scyllia_paramamosain  | MDAIRKRMHRIHFNNAERECFADKFAHHSFQIEELVSLQKIKATDQIRYSGDHAQCEFLAEKKAIAEAVALNRRICQEBBIRACERITAIQRIQDEEFAA    | 120 |
| Consensus             | sdaiKKkq kl k na dra e k a r e k e d e l a l a e va lnrriqi ee l r eri ta kl sa aa                      |     |
| Bos_taurus            | DESERKRVNLSFACDEEVEIQDQLKEAHHIADRRRYGEVARRKVIHSDLEAEERAEISGWCALLESHTVTNIRGDEAGRRGQRRRGGIATNISKLPAGEBRAE | 240 |
| Gallus_gallus         | DESERKRVNLSFACDEEVEIQDQLKEAHHIADRRRYGEVARRKVIHSDLEAEERAEISGWCALLESHTVTNIRGDEAGRRGQRRRGGIATNISKLPAGEBRAE | 240 |
| Homo_sapiens_2        | DESERKRVNLSFACDEEVEIQDQLKEAHHIADRRRYGEVARRKVIHSDLEAEERAEISGWCALLESHTVTNIRGDEAGRRGQRRRGGIATNISKLPAGEBRAE | 240 |
| Homo_sapiens_4        | DESERKRVNLSFACDEEVEIQDQLKEAHHIADRRRYGEVARRKVIHSDLEAEERAEISGWCALLESHTVTNIRGDEAGRRGQRRRGGIATNISKLPAGEBRAE | 240 |
| Oryctolagus_cuniculus | DESERKRVNLSFACDEEVEIQDQLKEAHHIADRRRYGEVARRKVIHSDLEAEERAEISGWCALLESHTVTNIRGDEAGRRGQRRRGGIATNISKLPAGEBRAE | 240 |
| Scyllia_paramamosain  | DESERKRVNLSFACDEEVEIQDQLKEAHHIADRRRYGEVARRKVIHSDLEAEERAEISGWCALLESHTVTNIRGDEAGRRGQRRRGGIATNISKLPAGEBRAE | 240 |
| Consensus             | deser kv e r dee m e qlkea se adky evarkl e dleaeerae e lee l lk l k qe ye ik l klk ae rae              |     |
| Bos_taurus            | FAERSVRLHSNLEDELYAQLKYKAISEIDBALNDMTS                                                                   | 283 |
| Gallus_gallus         | FAERSVRLHSNLEDELYAQLKYKAISEIDBALNDMTS                                                                   | 283 |
| Homo_sapiens_2        | FAERSVRLHSNLEDELYAQLKYKAISEIDBALNDMTS                                                                   | 283 |
| Homo_sapiens_4        | FAERSVRLHSNLEDELYAQLKYKAISEIDBALNDMTS                                                                   | 283 |
| Oryctolagus_cuniculus | FAERSVRLHSNLEDELYAQLKYKAISEIDBALNDMTS                                                                   | 283 |
| Scyllia_paramamosain  | FAERSVRLHSNLEDELYAQLKYKAISEIDBALNDMTS                                                                   | 283 |
| Consensus             | faersv kl k d le k ld                                                                                   |     |

B

|                               |                                                                                                         |     |
|-------------------------------|---------------------------------------------------------------------------------------------------------|-----|
| Blattella_germanica           | MAIRKMGAMGHRHFNNAERECFADKFAHHSFQIEELVSLQKIKATDQIRYSGDHAQCEFLAEKKAIAEAVALNRRICQEBBIRACERITAIQRIQDEEFAA   | 120 |
| Charybdis_feriatatus          | MAIRKMGAMGHRHFNNAERECFADKFAHHSFQIEELVSLQKIKATDQIRYSGDHAQCEFLAEKKAIAEAVALNRRICQEBBIRACERITAIQRIQDEEFAA   | 120 |
| Dermatophagoides_pteronysinus | MAIRKMGAMGHRHFNNAERECFADKFAHHSFQIEELVSLQKIKATDQIRYSGDHAQCEFLAEKKAIAEAVALNRRICQEBBIRACERITAIQRIQDEEFAA   | 120 |
| Oreochromis_mossambicus       | MAIRKMGAMGHRHFNNAERECFADKFAHHSFQIEELVSLQKIKATDQIRYSGDHAQCEFLAEKKAIAEAVALNRRICQEBBIRACERITAIQRIQDEEFAA   | 120 |
| Fenaesus_aztecus              | MAIRKMGAMGHRHFNNAERECFADKFAHHSFQIEELVSLQKIKATDQIRYSGDHAQCEFLAEKKAIAEAVALNRRICQEBBIRACERITAIQRIQDEEFAA   | 120 |
| Salmo_salar                   | MAIRKMGAMGHRHFNNAERECFADKFAHHSFQIEELVSLQKIKATDQIRYSGDHAQCEFLAEKKAIAEAVALNRRICQEBBIRACERITAIQRIQDEEFAA   | 120 |
| Scyllia_paramamosain          | MAIRKMGAMGHRHFNNAERECFADKFAHHSFQIEELVSLQKIKATDQIRYSGDHAQCEFLAEKKAIAEAVALNRRICQEBBIRACERITAIQRIQDEEFAA   | 120 |
| Todarodes_pacificus           | MAIRKMGAMGHRHFNNAERECFADKFAHHSFQIEELVSLQKIKATDQIRYSGDHAQCEFLAEKKAIAEAVALNRRICQEBBIRACERITAIQRIQDEEFAA   | 120 |
| Consensus                     | m aik km k k a d a e e qk e d e l l k e lnrriqi ee l r eri a kl a a                                     |     |
| Blattella_germanica           | DESERKRVNLSFACDEEVEIQDQLKEAHHIADRRRYGEVARRKVIHSDLEAEERAEISGWCALLESHTVTNIRGDEAGRRGQRRRGGIATNISKLPAGEBRAE | 240 |
| Charybdis_feriatatus          | DESERKRVNLSFACDEEVEIQDQLKEAHHIADRRRYGEVARRKVIHSDLEAEERAEISGWCALLESHTVTNIRGDEAGRRGQRRRGGIATNISKLPAGEBRAE | 240 |
| Dermatophagoides_pteronysinus | DESERKRVNLSFACDEEVEIQDQLKEAHHIADRRRYGEVARRKVIHSDLEAEERAEISGWCALLESHTVTNIRGDEAGRRGQRRRGGIATNISKLPAGEBRAE | 240 |
| Oreochromis_mossambicus       | DESERKRVNLSFACDEEVEIQDQLKEAHHIADRRRYGEVARRKVIHSDLEAEERAEISGWCALLESHTVTNIRGDEAGRRGQRRRGGIATNISKLPAGEBRAE | 240 |
| Fenaesus_aztecus              | DESERKRVNLSFACDEEVEIQDQLKEAHHIADRRRYGEVARRKVIHSDLEAEERAEISGWCALLESHTVTNIRGDEAGRRGQRRRGGIATNISKLPAGEBRAE | 240 |
| Salmo_salar                   | DESERKRVNLSFACDEEVEIQDQLKEAHHIADRRRYGEVARRKVIHSDLEAEERAEISGWCALLESHTVTNIRGDEAGRRGQRRRGGIATNISKLPAGEBRAE | 240 |
| Scyllia_paramamosain          | DESERKRVNLSFACDEEVEIQDQLKEAHHIADRRRYGEVARRKVIHSDLEAEERAEISGWCALLESHTVTNIRGDEAGRRGQRRRGGIATNISKLPAGEBRAE | 240 |
| Todarodes_pacificus           | DESERKRVNLSFACDEEVEIQDQLKEAHHIADRRRYGEVARRKVIHSDLEAEERAEISGWCALLESHTVTNIRGDEAGRRGQRRRGGIATNISKLPAGEBRAE | 240 |
| Consensus                     | deser k e dee ql ea se ad k e arkl e dler e r e e k cleesl v nn ksl e e i lk ae ra                      |     |
| Blattella_germanica           | FAERSVRLHSNLEDELYAQLKYKAISEIDBALNDMTS                                                                   | 283 |
| Charybdis_feriatatus          | FAERSVRLHSNLEDELYAQLKYKAISEIDBALNDMTS                                                                   | 283 |
| Dermatophagoides_pteronysinus | FAERSVRLHSNLEDELYAQLKYKAISEIDBALNDMTS                                                                   | 283 |
| Oreochromis_mossambicus       | FAERSVRLHSNLEDELYAQLKYKAISEIDBALNDMTS                                                                   | 283 |
| Fenaesus_aztecus              | FAERSVRLHSNLEDELYAQLKYKAISEIDBALNDMTS                                                                   | 283 |
| Salmo_salar                   | FAERSVRLHSNLEDELYAQLKYKAISEIDBALNDMTS                                                                   | 283 |
| Scyllia_paramamosain          | FAERSVRLHSNLEDELYAQLKYKAISEIDBALNDMTS                                                                   | 283 |
| Todarodes_pacificus           | FAERSVRLHSNLEDELYAQLKYKAISEIDBALNDMTS                                                                   | 283 |
| Consensus                     | aer v kl k ledel k                                                                                      |     |

14  
15

16 **Table S1 Specific IgE levels and symptoms of the crab sensitive individuals.**

| Number | Sex <sup>a</sup> | Symptom               | Specific IgE (f23, kU <sub>A</sub> /L) |
|--------|------------------|-----------------------|----------------------------------------|
| 1      | M                | urticaria             | ≥100.0                                 |
| 2      | F                | allergic dermatitis   | 97.3                                   |
| 3      | F                | dermatitis            | 78.6                                   |
| 4      | M                | anaphylactic rhinitis | 32.1                                   |
| 5      | F                | eczema                | 23.6                                   |
| 6      | F                | pruritus              | 14.3                                   |
| 7      | M                | acute bronchitis      | 9.3                                    |
| 8      | M                | urticaria             | 7.4                                    |
| 9      | F                | allergic dermatitis   | 34.7                                   |
| 10     | M                | pruritus and nuasea   | 9.2                                    |
| 11     | F                | - <sup>b</sup>        | 0.3                                    |
| 12     | M                | - <sup>b</sup>        | 0.2                                    |

17 **Note:** <sup>a</sup>-M, male; F, female. <sup>b</sup>- means food allergy-free.
